# Supplementary material
Source: MDPI journal article supplement (https://www.mdpi.com/2227-9717/11/1/276)
Supplement: s1 [file s1]

## **Material S1: Details of animal experimentation**

Male Sprague Dawley rats (150-200 g) were purchased from the Small Animal Breeding Station, Agricultural University, Mannuthy, Kerala and were maintained under standardized environmental conditions (22-28°C, 60-70% relative humidity, 12 hr dark/light cycle) and fed with standard rat feed (Lipton India) and water ad libitum. All animal experiments were conducted during the present study got prior permission from Institutional Animal Ethics Committee (IAEC approved) and followed the guidelines of IAEC.

Groups I (normal) and II (control) received no pre-treatment. Group III (standard) received a 15 day long pre-treatment using the standard drug, silymarin at a dosage of 100 mg/kg body weight, orally. Groups IV (AML) and V (AMH) were orally administered with an aqueous suspension of *Annona muricata* fruit pulp at dosages of 1 and 2 g/kg body weight, respectively for 14 days, prior to the induction of hepatotoxicity. The administration volume was adjusted to 2 ml for the above groups. On the 15th day of the study, all groups, except normal were orally induced with paracetamol at a dosage of 2.5 g/kg body weight so as to induce liver damage. After 24 h of hepatotoxicity induction which included a 10 h terminal starvation period, all the animals were sacrificed; and blood and liver tissues were collected for various experiments.

**Table S1.** Statistical comparison details of table 3

|                               | Mean Difference | 95.00% CI of difference | Adjusted P Value |
|-------------------------------|-----------------|-------------------------|------------------|
| <b>Aspartate transaminase</b> |                 |                         |                  |
| Normal vs. APAP               | -36.91          | -43.13 to -30.69        | <0.0001          |
| Normal vs. APAP+ Silymarin    | -5.68           | -11.9 to 0.5435         | 0.0916           |
| Normal vs. APAP+ AML          | -10.68          | -16.9 to -4.456         | <0.0001          |
| Normal vs. APAP+ AMH          | -13.92          | -20.14 to -7.696        | <0.0001          |
| APAP vs. APAP+ Silymarin      | 31.23           | 25.01 to 37.45          | <0.0001          |
| APAP vs. APAP+ AML            | 26.23           | 20.01 to 32.45          | <0.0001          |
| APAP vs. APAP+ AMH            | 22.99           | 16.77 to 29.21          | <0.0001          |
| APAP+ Silymarin vs. APAP+ AML | -5              | -11.22 to 1.224         | 0.1786           |
| APAP+ Silymarin vs. APAP+ AMH | -8.24           | -14.46 to -2.016        | 0.0032           |
| APAP+ AML vs. APAP+ AMH       | -3.24           | -9.464 to 2.984         | 0.6045           |
| <b>Alanine transaminase</b>   |                 |                         |                  |
| Normal vs. APAP               | -46.08          | -52.3 to -39.86         | <0.0001          |
| Normal vs. APAP+ Silymarin    | -23.68          | -29.9 to -17.46         | <0.0001          |
| Normal vs. APAP+ AML          | -12.82          | -19.04 to -6.596        | <0.0001          |
| Normal vs. APAP+ AMH          | -5.8            | -12.02 to 0.4235        | 0.0806           |
| APAP vs. APAP+ Silymarin      | 22.4            | 16.18 to 28.62          | <0.0001          |
| APAP vs. APAP+ AML            | 33.26           | 27.04 to 39.48          | <0.0001          |
| APAP vs. APAP+ AMH            | 40.28           | 34.06 to 46.5           | <0.0001          |
| APAP+ Silymarin vs. APAP+ AML | 10.86           | 4.636 to 17.08          | <0.0001          |
| APAP+ Silymarin vs. APAP+ AMH | 17.88           | 11.66 to 24.1           | <0.0001          |
| APAP+ AML vs. APAP+ AMH       | 7.02            | 0.7965 to 13.24         | 0.0185           |
| <b>Alkaline phosphatase</b>   |                 |                         |                  |
| Normal vs. APAP               | -23.22          | -29.44 to -17           | <0.0001          |
| Normal vs. APAP+ Silymarin    | -4.32           | -10.54 to 1.904         | 0.3130           |
| Normal vs. APAP+ AML          | -15.23          | -21.45 to -9.006        | <0.0001          |
| Normal vs. APAP+ AMH          | -10.08          | -16.3 to -3.856         | 0.0001           |
| APAP vs. APAP+ Silymarin      | 18.9            | 12.68 to 25.12          | <0.0001          |
| APAP vs. APAP+ AML            | 7.99            | 1.766 to 14.21          | 0.0047           |
| APAP vs. APAP+ AMH            | 13.14           | 6.916 to 19.36          | <0.0001          |
| APAP+ Silymarin vs. APAP+ AML | -10.91          | -17.13 to -4.686        | <0.0001          |
| APAP+ Silymarin vs. APAP+ AMH | -5.76           | -11.98 to 0.4635        | 0.0841           |
| APAP+ AML vs. APAP+ AMH       | 5.15            | -1.074 to 11.37         | 0.1555           |
| <b>Total Protein</b>          |                 |                         |                  |
| Normal vs. APAP               | 1.24            | -4.984 to 7.464         | 0.9818           |
| Normal vs. APAP+ Silymarin    | 0.1             | -6.124 to 6.324         | >0.9999          |
| Normal vs. APAP+ AML          | 0.36            | -5.864 to 6.584         | 0.9999           |
| Normal vs. APAP+ AMH          | 1.6             | -4.624 to 7.824         | 0.9540           |
| APAP vs. APAP+ Silymarin      | -1.14           | -7.364 to 5.084         | 0.9867           |
| APAP vs. APAP+ AML            | -0.88           | -7.104 to 5.344         | 0.9950           |
| APAP vs. APAP+ AMH            | 0.36            | -5.864 to 6.584         | 0.9999           |
| APAP+ Silymarin vs. APAP+ AML | 0.26            | -5.964 to 6.484         | >0.9999          |
| APAP+ Silymarin vs. APAP+ AMH | 1.5             | -4.724 to 7.724         | 0.9634           |

|                               |       |                 |         |
|-------------------------------|-------|-----------------|---------|
| APAP+ AML vs. APAP+ AMH       | 1.24  | -4.984 to 7.464 | 0.9818  |
| <b>Total bilirubin</b>        |       |                 |         |
| Normal vs. APAP               | -1.05 | -7.274 to 5.174 | 0.9902  |
| Normal vs. APAP+ Silymarin    | -0.39 | -6.614 to 5.834 | 0.9998  |
| Normal vs. APAP+ AML          | -0.48 | -6.704 to 5.744 | 0.9995  |
| Normal vs. APAP+ AMH          | -0.42 | -6.644 to 5.804 | 0.9997  |
| APAP vs. APAP+ Silymarin      | 0.66  | -5.564 to 6.884 | 0.9984  |
| APAP vs. APAP+ AML            | 0.57  | -5.654 to 6.794 | 0.9991  |
| APAP vs. APAP+ AMH            | 0.63  | -5.594 to 6.854 | 0.9986  |
| APAP+ Silymarin vs. APAP+ AML | -0.09 | -6.314 to 6.134 | >0.9999 |
| APAP+ Silymarin vs. APAP+ AMH | -0.03 | -6.254 to 6.194 | >0.9999 |
| APAP+ AML vs. APAP+ AMH       | 0.06  | -6.164 to 6.284 | >0.9999 |
| <b>Albumin</b>                |       |                 |         |
| Normal vs. APAP               | 4.07  | -2.154 to 10.29 | 0.3741  |
| Normal vs. APAP+ Silymarin    | 0.05  | -6.174 to 6.274 | >0.9999 |
| Normal vs. APAP+ AML          | 0.23  | -5.994 to 6.454 | >0.9999 |
| Normal vs. APAP+ AMH          | 0.02  | -6.204 to 6.244 | >0.9999 |
| APAP vs. APAP+ Silymarin      | -4.02 | -10.24 to 2.204 | 0.3870  |
| APAP vs. APAP+ AML            | -3.84 | -10.06 to 2.384 | 0.4348  |
| APAP vs. APAP+ AMH            | -4.05 | -10.27 to 2.174 | 0.3792  |
| APAP+ Silymarin vs. APAP+ AML | 0.18  | -6.044 to 6.404 | >0.9999 |
| APAP+ Silymarin vs. APAP+ AMH | -0.03 | -6.254 to 6.194 | >0.9999 |
| APAP+ AML vs. APAP+ AMH       | -0.21 | -6.434 to 6.014 | >0.9999 |

**Table S2.** Statistical analysis details of Figure 1 (antioxidant parameters)

|                               | Mean<br>Difference | 95.00%<br>CI of difference | Adjusted P<br>Value |
|-------------------------------|--------------------|----------------------------|---------------------|
| <b>GSH</b>                    |                    |                            |                     |
| Normal vs. APAP               | 1.53               | 0.921 to 2.139             | <0.0001             |
| Normal vs. APAP+ Silymarin    | 0.11               | -0.499 to 0.719            | 0.9872              |
| Normal vs. APAP+ AML          | 0.23               | -0.379 to 0.839            | 0.8337              |
| Normal vs. APAP+ AMH          | 0.21               | -0.399 to 0.819            | 0.8748              |
| APAP vs. APAP+ Silymarin      | -1.42              | -2.029 to -0.811           | <0.0001             |
| APAP vs. APAP+ AML            | -1.3               | -1.909 to -0.691           | <0.0001             |
| APAP vs. APAP+ AMH            | -1.32              | -1.929 to -0.711           | <0.0001             |
| APAP+ Silymarin vs. APAP+ AML | 0.12               | -0.489 to 0.729            | 0.9823              |
| APAP+ Silymarin vs. APAP+ AMH | 0.1                | -0.509 to 0.709            | 0.9911              |
| APAP+ AML vs. APAP+ AMH       | -0.02              | -0.629 to 0.589            | >0.9999             |
| <b>Superoxide dismutase</b>   |                    |                            |                     |
| Normal vs. APAP               | 0.11               | -0.499 to 0.719            | 0.9872              |
| Normal vs. APAP+ Silymarin    | 0.011              | -0.598 to 0.62             | >0.9999             |
| Normal vs. APAP+ AML          | 0.041              | -0.568 to 0.65             | 0.9997              |
| Normal vs. APAP+ AMH          | 0.009              | -0.6 to 0.618              | >0.9999             |
| APAP vs. APAP+ Silymarin      | -0.099             | -0.708 to 0.51             | 0.9914              |
| APAP vs. APAP+ AML            | -0.069             | -0.678 to 0.54             | 0.9979              |
| APAP vs. APAP+ AMH            | -0.101             | -0.71 to 0.508             | 0.9908              |
| APAP+ Silymarin vs. APAP+ AML | 0.03               | -0.579 to 0.639            | >0.9999             |
| APAP+ Silymarin vs. APAP+ AMH | -0.002             | -0.611 to 0.607            | >0.9999             |
| APAP+ AML vs. APAP+ AMH       | -0.032             | -0.641 to 0.577            | 0.9999              |
| <b>Glutathione peroxidase</b> |                    |                            |                     |
| Normal vs. APAP               | 2.64               | 2.031 to 3.249             | <0.0001             |
| Normal vs. APAP+ Silymarin    | 0.79               | 0.181 to 1.399             | 0.0042              |
| Normal vs. APAP+ AML          | -0.07              | -0.679 to 0.539            | 0.9978              |
| Normal vs. APAP+ AMH          | -0.38              | -0.989 to 0.229            | 0.4213              |
| APAP vs. APAP+ Silymarin      | -1.85              | -2.459 to -1.241           | <0.0001             |
| APAP vs. APAP+ AML            | -2.71              | -3.319 to -2.101           | <0.0001             |
| APAP vs. APAP+ AMH            | -3.02              | -3.629 to -2.411           | <0.0001             |
| APAP+ Silymarin vs. APAP+ AML | -0.86              | -1.469 to -0.251           | 0.0014              |
| APAP+ Silymarin vs. APAP+ AMH | -1.17              | -1.779 to -0.561           | <0.0001             |
| APAP+ AML vs. APAP+ AMH       | -0.31              | -0.919 to 0.299            | 0.6231              |
| <b>Catalase</b>               |                    |                            |                     |
| Normal vs. APAP               | 4.41               | 3.801 to 5.019             | <0.0001             |
| Normal vs. APAP+ Silymarin    | 1.03               | 0.421 to 1.639             | <0.0001             |
| Normal vs. APAP+ AML          | 3.46               | 2.851 to 4.069             | <0.0001             |
| Normal vs. APAP+ AMH          | 1.47               | 0.861 to 2.079             | <0.0001             |
| APAP vs. APAP+ Silymarin      | -3.38              | -3.989 to -2.771           | <0.0001             |
| APAP vs. APAP+ AML            | -0.95              | -1.559 to -0.341           | 0.0003              |
| APAP vs. APAP+ AMH            | -2.94              | -3.549 to -2.331           | <0.0001             |
| APAP+ Silymarin vs. APAP+ AML | 2.43               | 1.821 to 3.039             | <0.0001             |
| APAP+ Silymarin vs. APAP+ AMH | 0.44               | -0.169 to 1.049            | 0.2722              |

|                               |        |                  |         |
|-------------------------------|--------|------------------|---------|
| APAP+ AML vs. APAP+ AMH       | -1.99  | -2.599 to -1.381 | <0.0001 |
| <b>MDA</b>                    |        |                  |         |
| Normal vs. APAP               | -0.347 | -0.956 to 0.262  | 0.5148  |
| Normal vs. APAP+ Silymarin    | -0.047 | -0.656 to 0.562  | 0.9995  |
| Normal vs. APAP+ AML          | -0.228 | -0.837 to 0.381  | 0.8381  |
| Normal vs. APAP+ AMH          | -0.062 | -0.671 to 0.547  | 0.9986  |
| APAP vs. APAP+ Silymarin      | 0.3    | -0.309 to 0.909  | 0.6521  |
| APAP vs. APAP+ AML            | 0.119  | -0.49 to 0.728   | 0.9829  |
| APAP vs. APAP+ AMH            | 0.285  | -0.324 to 0.894  | 0.6946  |
| APAP+ Silymarin vs. APAP+ AML | -0.181 | -0.79 to 0.428   | 0.9232  |
| APAP+ Silymarin vs. APAP+ AMH | -0.015 | -0.624 to 0.594  | >0.9999 |
| APAP+ AML vs. APAP+ AMH       | 0.166  | -0.443 to 0.775  | 0.9429  |
